# Supplementary material for: Comparative proteomic analysis of multi-ovary wheat under heterogeneous cytoplasm suppression
Source: BMC Plant Biol. 2019 May 2;19:175. doi: 10.1186/s12870-019-1778-y (PMC6498644; doi:10.1186/s12870-019-1778-y)
Supplement: Supplementary file 3 — Table S1. Identification of differentially expressed proteins between DUOII × TZI and TZI × DUOII. (XLSX 24 kb) [file 12870_2019_1778_MOESM3_ESM.xlsx]

## Sheet: Sheet1
Table S1 Identification of differentially expressed proteins between DUOⅡ× TZⅠand TZⅠ× DUOⅡ
a Spot numbers correspond with 2-D gel as shown in Additional file 1: Figure S1.
b The mean value of three biological replicates of each sopt ± standard deviation based on PDQuest software.
c The significance level calculated by Student’s t-test.
d The ration of spot intensities between DUOⅡ× TZⅠand TZⅠ× DUOⅡ. The fold changes had p values. "*" represents p < 0.05; "**" represents p <0.01.
e Compared to DUOⅡ× TZⅠ, the protein intensity are upregulated and downregulated in TZⅠ× DUOⅡ, respectively.
f Protein names from the NCBI or Swissprot databases.
g Accession number in NCBI or Swissprot databases.
h Protein species from the NCBI or Swissprot databases.
i Protein score was based on combined MS and MS/MS spectra from the MASCOT results.
j The number of matched peptides.
k The number of matched sequences.
l Molecular mass of predicted protein/pI of predicted protein.
m Molecular mass of protein on the gel/pI of protein on the gel.
Spot No. a	Spot intensity (Mean±SD) b		Fold Change			Protein name f	Accession No. g	Source species h	Score i	NP j	NC k	TMr (kDa) /TpI l	EMr (kDa)/EpI m
	DUOⅡ× TZⅠ	TZⅠ× DUOⅡ	p Value c	Fold d	Up or Down e
1	54615.9±17154.3	19010.9±1785.7	0.0433	2.87*	Down	29 kDa ribonucleoprotein A, chloroplastic-like	gi|1149735951	Aegilops tauschii subsp. tauschii	331	17	4	29.57/4.8	28.48/4.61
2	53491.9±15639.5	17351.2±4631.8	0.0351	3.08*	Down	31 kDa ribonucleoprotein, chloroplastic	gi|474256042	Triticum urartu	331	3	2	25.16/4.73	28.39/4.66
3	43054.3±9006	19186.4±2921.2	0.0235	2.24*	Down	elongation factor 1-delta 1-like	gi|1149716657	Aegilops tauschii subsp. tauschii	398	24	6	24.7/4.52	31.45/4.77
4	78384.5±7052.3	38507.3±2355.3	0.0016	2.04**	Down	NAP1-related protein 2	gi|1149742847	Aegilops tauschii subsp. tauschii	136	7	3	28.86/4.26	34.58/4.56
5	19208.1±1992.4	10794±3020.4	0.0303	1.78*	Down	nucleosome assembly protein 1;2	gi|1149799768	Aegilops tauschii subsp. tauschii	504	24	9	41.36/4.4	58.89/4.64
6	45676±5055.3	30046.8±4547.3	0.0314	1.52*	Down	eukaryotic translation initiation factor 6-2	gi|1149812415	Aegilops tauschii subsp. tauschii	321	20	3	26.94/4.72	27.55/4.87
7	40029.9±8182.6	11003.6±862.9	0.0075	3.64**	Down	Elongation factor 1-beta	EF1B_WHEAT	Triticum aestivum	193	15	6	23.19/4.54	30.23/4.9
8	23556.9±6585.9	9204.8±2453.6	0.0447	2.56*	Down	ascorbate peroxidase	gi|15808779	Hordeum vulgare subsp. vulgare	161	5	3	27.96/5.1	28.58/5
9	23942.7±1794.7	13904±2746.7	0.0124	1.72*	Down	3'(2'),5'-bisphosphate nucleotidase	gi|474042762	Triticum urartu	293	12	5	27.34/4.69	43.12/4.89
10	56177.1±5841.6	33556.6±8179.3	0.0334	1.67*	Down	26S protease regulatory subunit 6A-like protein A	gi|473727146	Triticum urartu	990	67	13	57.89/5.28	53.26/4.99
11	22351.6±1972.9	13794.4±3271.1	0.0339	1.62*	Down	histone-binding protein MSI1-like	gi|1149774685	Aegilops tauschii subsp. tauschii	458	31	9	44.32/4.83	50.7/5.02
12	23322.2±1969.6	15351±3004.8	0.0349	1.52*	Down	histone-binding protein MSI1-like	gi|1149774685	Aegilops tauschii subsp. tauschii	211	14	6	44.32/4.83	51.58/4.99
13	21777.9±2632.8	11363.3±1065.1	0.0066	1.92**	Down	ubiquitin receptor RAD23d-like	gi|1149787016	Aegilops tauschii subsp. tauschii	421	22	8	42.44/4.63	51.73/4.93
14	30706.6±2048.6	19353.6±2640.7	0.0086	1.59**	Down	putative DNA repair protein RAD23	gi|474307163	Triticum urartu	281	13	5	44.29/4.9	51.58/4.88
15	15961.1±1367.7	8083.7±1643.2	0.0065	1.97**	Down	ubiquitin-like protein	gi|224551496	Triticum aestivum	402	14	6	58.2/4.93	60.21/4.91
16	22645.4±2092.4	12192.1±4659.3	0.0444	1.86*	Down	uncharacterized protein LOC109785555	gi|1149755629	Aegilops tauschii subsp. tauschii	585	31	17	55.53/4.74	66.2/4.96
17	11336.8±902.4	6923±466.5	0.0036	1.64**	Down	ruBisCO large subunit-binding protein subunit alpha, chloroplastic	gi|1149765913	Aegilops tauschii subsp. tauschii	1197	45	14	61.5/5.12	62.76/5.04
18	10133.5±924.5	5847.6±910.9	0.0095	1.73**	Down	TaWIN1	gi|9798603	Triticum aestivum	296	14	6	29.49/4.75	33.2/5.05
19	2807.6±611.6	5138.7±644.5	0.0206	1.83*	Up	predicted protein	gi|326506972	Hordeum vulgare subsp. vulgare	664	36	11	41.08/5.85	38.4/5.06
20	123407.9±18857.4	38875.7±7410.2	0.0041	3.17**	Down	Elongation factor 1-alpha	EF1A_WHEAT	Triticum aestivum	514	37	8	49.48/9.2	51.94/5.13
21	16843.9±2300.4	10554±852.2	0.0222	1.6*	Down	inversin-B	gi|1149800530	Aegilops tauschii subsp. tauschii	292	17	7	49.33/5.07	47.78/5.13
22	156963.4±13491.8	80810.7±13296.2	0.0047	1.94**	Down	beta tubulin 3	gi|146760211	Hordeum vulgare subsp. vulgare	940	39	9	50.83/4.7	55.02/5.01
23	24862.9±4419.2	13599±1403.2	0.0264	1.83*	Down	ubiquitin domain-containing protein DSK2a-like isoform X2	gi|1149811369	Aegilops tauschii subsp. tauschii	243	15	6	55.52/4.84	59.18/5.04
24	32364±9396.8	54091.4±2094.7	0.0332	1.67*	Up	heat shock cognate 70 kDa protein 2-like	gi|1149813629	Aegilops tauschii subsp. tauschii	1088	68	15	71.48/5.07	82.37/5.22
25	16689.9±4657.2	6744.8±836.1	0.041	2.47*	Down	flowering locus K homology domain-like	gi|1149798945	Aegilops tauschii subsp. tauschii	422	20	9	55.45/4.81	79.09/5.11
26	11524.5±1381.8	3830.9±748	0.0023	3.01**	Down	flowering locus K homology domain-like	gi|1149798945	Aegilops tauschii subsp. tauschii	709	30	10	55.45/4.81	78.08/5.08
27	9511.6±1704.5	5443.5±358	0.0298	1.75*	Down	flowering locus K homology domain-like	gi|1149798945	Aegilops tauschii subsp. tauschii	786	30	10	55.45/4.81	82.63/5.09
28	1269.9±901	4129±418.5	0.0152	3.25*	Up	MICOS complex subunit mic60	gi|1149814058	Aegilops tauschii subsp. tauschii	157	11	6	65.84/5.12	106.13/5.19
29	22898.9±4884	10589.6±401.2	0.0237	2.16*	Down	unnamed protein product	gi|669028241	Triticum aestivum	404	26	6	16.23/4.97	21.15/5.25
30	45363.9±2754.1	18931.1±2757.3	0.0007	2.4**	Down	40S ribosomal protein S3-3	gi|473889537	Triticum urartu	206	16	6	25.52/9.55	26.23/5.39
31	32925.2±7100.4	10925.1±7758	0.0416	3.01*	Down	SUMO-activating enzyme subunit 1A-like	gi|1149785977	Aegilops tauschii subsp. tauschii	312	23	6	37.05/5.12	41.11/5.33
32	24755.5±3706.9	13367.6±3882	0.0399	1.85*	Down	photosystem II stability/assembly factor HCF136, chloroplastic	gi|1149807721	Aegilops tauschii subsp. tauschii	149	6	3	42.03/6.47	40.54/5.33
33	17216.7±3268.5	7809.3±973.7	0.0175	2.2*	Down	Adenosine kinase 2	gi|474049015	Triticum urartu	98	5	4	37.68/5.01	42.59/5.38
34	41296.7±13318.9	4913.1±6948.1	0.0267	8.41*	Down	Tubulin beta-4 chain	TBB4_WHEAT	Triticum aestivum	731	36	9	50.64/4.78	55.82/5.24
35	146984.6±37385.4	39116±7676.4	0.0162	3.76*	Down	UTP--glucose-1-phosphate uridylyltransferase	gi|1149721283	Aegilops tauschii subsp. tauschii	916	58	13	51.8/5.2	51.94/5.33
36	41449.1±6679.8	7275.2±6181.8	0.006	5.7**	Down	ruBisCO large subunit-binding protein subunit alpha	gi|1149795975	Aegilops tauschii subsp. tauschii	689	34	16	61.78/5.3	58.89/5.23
37	30214.9±2114.7	0±0	0	Down**	Down	ATP synthase CF1 beta subunit (chloroplast)	gi|14017579	Triticum aestivum	282	25	10	53.88/5.06	59.26/5.3
38	79242.5±3948.9	42291.1±3675.6	0.0006	1.87**	Down	chaperonin 60-like protein	gi|578003637	Triticum aestivum	1493	90	21	64.26/6.4	62.91/5.31
39	67478.7±12349.1	35338.4±4780.7	0.0265	1.91*	Down	Chaperonin CPN60-2, mitochondrial	gi|474040032	Triticum urartu	1633	95	20	68.74/5.76	61.81/5.38
40	20815.9±14763.5	70440.2±13188.6	0.0239	3.38*	Up	heat shock cognate 70 kDa protein 2-like	gi|1149813629	Aegilops tauschii subsp. tauschii	718	50	13	71.48/5.07	82.12/5.29
41	67935±14426.4	35319.9±5187	0.0396	1.92*	Down	triosephosphat-isomerase	gi|11124572	Triticum aestivum	932	38	7	27.01/5.38	26/5.54
42	31273.8±7159.1	12700.6±384.1	0.0215	2.46*	Down	cinnamoyl-CoA reductase 1	gi|1149795493	Aegilops tauschii subsp. tauschii	218	15	4	36/5.27	35.38/5.52
43	172.5±243.9	2525.3±660.3	0.0091	14.64**	Up	eukaryotic translation initiation factor 2 subunit alpha homolog	gi|1149761154	Aegilops tauschii subsp. tauschii	147	4	4	38.14/5.26	39.57/5.57
44	72190.4±8969.8	39526.9±10122.6	0.0269	1.83*	Down	UTP--glucose-1-phosphate uridylyltransferase	gi|1149721283	Aegilops tauschii subsp. tauschii	949	59	11	51.8/5.2	52.82/5.41
45	36623.5±4847.8	20757.4±3454.2	0.0196	1.76*	Down	Elongation factor Tu, chloroplastic	gi|474198705	Triticum urartu	1244	61	9	45.8/4.61	48.07/5.6
46	35606.8±685.4	19835.8±647.8	0	1.8**	Down	enolase	gi|461744058	Triticum aestivum	346	17	8	48.46/5.49	58.82/5.52
47	55101.5±4212.9	28857.4±2053.2	0.0014	1.91**	Down	HSP70, partial	gi|379645201	Triticum aestivum	1081	66	15	72.82/5.88	75.05/5.42
48	81061±19672.3	34289.8±8197	0.0361	2.36*	Down	vacuolar proton-ATPase subunit A	gi|90025017	Triticum aestivum	609	33	13	68.75/5.23	73.78/5.48
49	36720.9±3313.9	15971.7±4521.9	0.0064	2.3**	Down	2,3-bisphosphoglycerate-independent phosphoglycerate mutase	gi|1149725896	Aegilops tauschii subsp. tauschii	239	18	9	60.81/5.48	67.46/5.59
50	817±1155.5	10095.3±4499.9	0.0476	12.36*	Up	transketolase, chloroplastic	gi|1149797702	Aegilops tauschii subsp. tauschii	280	18	9	80.53/5.88	96.53/5.6
51	30959.2±7847	13461.1±3710.5	0.0464	2.3*	Down	RNA-binding KH domain-containing protein PEPPER	gi|1149812861	Aegilops tauschii subsp. tauschii	770	39	11	48.17/5.42	63.79/5.46
52	16558.4±3361.6	7743.7±1729.5	0.03	2.14*	Down	DNA polymerase alpha subunit B	gi|1149727299	Aegilops tauschii subsp. tauschii	593	32	9	69.74/5.2	99.56/5.46
53	15664.7±4081.3	7100.1±998	0.0449	2.21*	Down	far upstream element-binding protein 2	gi|1149753676	Aegilops tauschii subsp. tauschii	656	36	10	70.44/5.68	133.93/5.47
54	21113.4±2807.3	5689.9±1681	0.0026	3.71**	Down	uncharacterized protein LOC109761991	gi|1149840985	Aegilops tauschii subsp. tauschii	254	10	7	92.5/5.14	163.5/5.49
55	3767.1±2636.2	20113.3±5419.3	0.0185	5.34*	Up	transketolase, chloroplastic	gi|1149797702	Aegilops tauschii subsp. tauschii	299	23	9	80.53/5.88	96.53/5.65
56	0±0	9509.9±3514	0.0187	Up**	Up	carbamoyl-phosphate synthase large chain, chloroplastic	gi|1149840659	Aegilops tauschii subsp. tauschii	757	51	19	128.52/5.82	157.18/5.72
57	14271±5178.4	3785.3±824.3	0.0474	3.77*	Down	replication protein A 32 kDa subunit A-like	gi|1149710873	Aegilops tauschii subsp. tauschii	136	7	4	29.86/5.75	32.06/6.02
58	35665.9±6464.4	17807.1±4052.7	0.0296	2*	Down	glyoxylate/succinic semialdehyde reductase 1	gi|1149777760	Aegilops tauschii subsp. tauschii	348	19	5	30.59/5.97	30.35/6.03
59	16238.2±1769.9	9304.5±1397	0.0122	1.75*	Down	hydroxyphenylpyruvate reductase isoform X1	gi|1149781549	Aegilops tauschii subsp. tauschii]	305	19	5	34.78/5.47	39.8/5.93
60	20456.7±1860.5	9366.5±1484.7	0.0027	2.18**	Down	Glutamate-1-semialdehyde 2,1-aminomutase, chloroplastic	gi|473886110	Triticum urartu	273	14	7	49.83/6.24	43.32/6.07
61	26299.5±6244.5	9240.6±1341.8	0.0195	2.85*	Down	Phosphoglycerate kinase, cytosolic	gi|473781647	Triticum urartu	309	19	11	45.29/5.9	43.53/5.95
62	18719.7±4821.1	3568.7±2524.6	0.017	5.25*	Down	Intracellular protease 1	gi|474072321	Triticum urartu	226	14	6	45.81/6.16	48.51/5.95
63	22501.9±3304.2	10028.2±4139.9	0.0291	2.24*	Down	ribosome biogenesis protein WDR12 homolog	gi|1149801823	Aegilops tauschii subsp. tauschii	266	9	4	47.85/5.76	51.21/6.01
64	0±0	7050.6±1272	0.0014	Up**	Up	26S protease regulatory subunit 6B-like protein	gi|473825073	Triticum urartu	316	34	11	41.6/5.91	53.11/6.01
65	27541.1±7892.3	10553.3±2322.6	0.0432	2.61*	Down	adenosylhomocysteinase	gi|1149718144	Aegilops tauschii subsp. tauschii	218	9	8	53.91/5.62	61.08/5.96
66	47887±9400.8	20701.2±3576	0.0187	2.31*	Down	ATP synthase subunit alpha, mitochondrial	ATPAM_WHEAT	Triticum aestivum	1046	76	16	55.52/5.7	58.89/6.04
67	37634.5±4606.2	16465.7±2424.3	0.0045	2.29**	Down	polyadenylate-binding protein RBP45-like isoform X1	gi|1149710662	Aegilops tauschii subsp. tauschii	354	21	6	51.14/5.56	73.02/5.95
68	32760±8368.3	11922.1±2014.4	0.0267	2.75*	Down	ketol-acid reductoisomerase, chloroplastic	gi|1149835491	Aegilops tauschii subsp. tauschii	308	22	9	62.71/5.96	65.4/5.92
69	11051.8±1388.3	6235.6±1107.4	0.0185	1.77*	Down	putative aconitate hydratase, cytoplasmic	gi|1149840689	Aegilops tauschii subsp. tauschii	673	63	18	106.71/6.34	128.37/6.07
70	40972.9±4299.5	23362±5923.4	0.0272	1.75*	Down	beta1 proteasome-1D	gi|66271071	Aegilops tauschii	984	45	7	26.15/5.32	24.57/6.16
71	14047.4±3811.9	5831.7±997.6	0.042	2.41*	Down	SEC13	gi|224589274	Triticum aestivum	92	3	3	33.57/5.78	32.87/6.26
72	16592.6±4406	7507.6±1383	0.0497	2.21*	Down	probable aldo-keto reductase 2	gi|1149711723	Aegilops tauschii subsp. tauschii	126	12	6	38.18/5.84	39.47/6.12
73	26367.8±6628	8856.8±2454.3	0.0248	2.98*	Down	WD repeat-containing protein VIP3	gi|1149754318	Aegilops tauschii subsp. tauschii	239	9	2	33.76/5.78	41.01/6.28
74	17701±3126.9	6965.7±1532.2	0.0121	2.54*	Down	serpin-ZX	gi|1149833305	Aegilops tauschii subsp. tauschii	274	17	7	42.59/5.89	43.49/6.29
75	15982.4±3739.4	7805.9±1661.2	0.0475	2.05*	Down	chloroplast aspartate aminotransferase, partial	gi|195957723	Triticum aestivum	200	18	5	41/6.69	44.16/6.24
76	23713.8±4759.9	11274.6±1424.3	0.024	2.1*	Down	ATP synthase subunit alpha, mitochondrial	ATPAM_WHEAT	Triticum aestivum	369	21	11	55.52/5.7	57.21/6.32
77	20509.8±6563.3	6701.1±999.3	0.0423	3.06*	Down	Betaine aldehyde dehydrogenase	gi|473888623	Triticum urartu	376	18	5	59.76/7.16	64.66/6.1
78	20180.6±3976.1	8765.3±799.5	0.0164	2.3*	Down	aldehyde dehydrogenase 7b	gi|300087069	Triticum aestivum	454	23	10	55.06/5.9	64.96/6.14
79	17194.7±3977.2	35935.9±1588.1	0.0035	2.09**	Up	proteasome subunit alpha type-6	gi|1149818669	Aegilops tauschii subsp. tauschii	516	46	8	27.53/6.33	26.32/6.72
80	25705.9±4559	13512.2±1952.6	0.0254	1.9*	Down	S-formylglutathione hydrolase-like protein	gi|521311579	Triticum monococcum subsp. monococcum	244	18	3	31.95/6.13	35.28/6.5
81	0±0	6306.1±1725.4	0.0067	Up**	Up	COMPASS-like H3K4 histone methylase component WDR5A	gi|1149733209	Aegilops tauschii subsp. tauschii	137	5	5	34.75/6.14	36.45/6.55
82	18653.9±5388.5	32313.4±816.1	0.0239	1.73*	Up	hypothetical protein TRIUR3_29100	gi|474396577	Triticum urartu	1188	83	10	41.29/6.27	37.46/6.59
83	32275.4±9849.1	75782.5±4900	0.005	2.35**	Up	hypothetical protein TRIUR3_29100	gi|474396577	Triticum urartu	1119	77	11	41.29/6.27	37.36/6.63
84	24791.8±1460.7	43959.3±8356.9	0.0331	1.77*	Up	alcohol dehydrogenase	gi|13924733	Hordeum vulgare subsp. vulgare	750	39	6	41.68/6.28	45.07/6.59
85	21777.8±2205.1	12088.2±2594.5	0.0158	1.8*	Down	Aspartate aminotransferase, mitochondrial	gi|474057935	Triticum urartu	285	20	7	44.95/5.82	57.06/6.33
86	4868.8±1047.1	19523.3±5150.7	0.0169	4.01*	Up	Ribulose bisphosphate carboxylase large chain	RBL_HORVU	Hordeum vulgare	459	31	10	53.67/6.22	56.33/6.35
87	0±0	5449.5±1306.9	0.0041	Up**	Up	unnamed protein product	gi|669031224	Triticum aestivum	452	25	10	61.32/6.23	70.75/6.5
88	11297.7±661.3	5283.5±1148.4	0.003	2.14**	Down	probable aldehyde dehydrogenase	gi|1149764685	Aegilops tauschii subsp. tauschii	520	35	13	61.42/7.21	65.91/6.49
89	70765.7±20583	176532.2±17956.1	0.0054	2.49**	Up	ricin B-like lectin R40C1	gi|1149805409	Aegilops tauschii subsp. tauschii	1335	88	13	38.99/6.27	37.29/6.75
90	59962.8±17191.7	138272.2±16758.4	0.0099	2.31**	Up	hypothetical protein TRIUR3_29100	gi|474396577	Triticum urartu	1356	95	11	41.29/6.27	37.26/6.7
