# Supplementary material for: Comparative proteomic analysis of multi-ovary wheat under heterogeneous cytoplasm suppression
Source: BMC Plant Biol. 2019 May 2;19:175. doi: 10.1186/s12870-019-1778-y (PMC6498644; doi:10.1186/s12870-019-1778-y)
Supplement: Supplementary file 4 — Table S2. Corresponding homologues of the predicted proteins and unnamed protein. (XLSX 16 kb) [file 12870_2019_1778_MOESM4_ESM.xlsx]

## Sheet: Sheet1
Table S2 Corresponding homologues of the predicted proteins and unnamed protein
a Gene index of the unknown proteins listed in Additional file 3: Table S1
b Accession number of the homologues in NCBI databases.
c Extent to which two amino acid sequences are invariant.
d Similarities based on the scoring matrix use
Spot No.	Gene index. a	Homologue
		accession no. b	Protein name	Species	Identities c	Positives d
19	gi|326506972	XP_020179865.1	probable fructokinase-6, chloroplastic	Aegilops tauschii subsp. tauschii	372/384(97%)	379/384(98%)
29	gi|669028241	ONM29616.1	Alba DNA/RNA-binding protein	Zea mays	122/159(77%)	129/159(81%)
87	gi|669031224	EMS49223.1	Bifunctional purine biosynthesis protein purH	Triticum urartu	492/500(98%)	498/500(99%)
